# Supplementary material for: Prognostic Impact of Muscle Mass in Idiopathic Interstitial Pneumonia: Analysis of Idiopathic Pulmonary Fibrosis and Other Idiopathic Interstitial Pneumonias
Source: Research Square preprint supplement (doi:10.21203/rs.3.rs-6717976/v1), 2025-06-23
Supplement: Supplementary file 4 [file 9b6798f21c1596addc39a7a2.docx]

**Table S4. Hazard ratios and 95% confidence intervals for the acute exacerbation of the normal muscle mass groups compared to the low muscle mass groups in the IPF and non-IPF cohort.**

| IIPs type | Covariates | N | ESMI | PMI |
| --- | --- | --- | --- | --- |
| HR (95% CI) | HR (95% CI) |
| IPF | None | 306 | 0.61  (0.36-1.03) | 0.69  (0.40-1.17) |
|  | Sex, Age, %FVC, Smoking level | 303 | 0.79  (0.46-1.38) | 0.92  (0.75-1.12) |
| non-IPF | None | 222 | 0.35  (0.20-0.60) | 0.50  (0.27-0.94) |
|  | Sex, Age, %FVC, Smoking level | 221 | 0.43  (0.22-0.83) | 0.85  (0.65-1.11) |

IPF, idiopathic pulmonary fibrosis; IIPs, idiopathic interstitial pneumonias; ESMI, erector spinae muscle index, PMI, pectoralis muscle index; HR, hazard ratio; CI, confidence interval; FVC, forced vital capacity; LDH, lactate dehydrogenase.
